# Supplementary material for: Computational study on redox-switchable second-order nonlinear optical properties of ferrocene-tetrathiafulvalene hybrid
Source: Royal Society of Chemistry journal article supplement (doi:10.1039/c4ra04548c), 2014-01-01
Supplement: c4ra04548c1.pdf [file c4ra04548c1.pdf]

## Supplementary Material

### Computational Study on Redox-Switchable Second-Order Nonlinear Optical Properties of Ferrocene-Tetrathiafulvalene Hybrid

Chun-Guang Liu<sup>†, ‡</sup>, Ming-Li Gao<sup>‡</sup>, and Zhi-Jian Wu<sup>\*†</sup>

<sup>†</sup> *State Key Laboratory of Rare Earth Resource Utilization, Changchun  
Institute of Applied Chemistry, Chinese Academy of Sciences, Changchun City,  
130022, P. R. China*

<sup>‡</sup> *College of Chemical Engineering, Northeast Dianli University Jilin City, 132012, P.  
R. China*

#### Compound H

|   |             |             |             |
|---|-------------|-------------|-------------|
| C | -3.21377300 | 0.16970800  | -1.20868000 |
| C | -1.89731200 | 0.11758900  | -0.87744000 |
| C | 0.50588100  | 0.66369400  | -0.03697600 |
| C | 0.49961900  | -0.66483700 | -0.22894700 |
| C | 2.90816700  | -0.10452300 | 0.49916300  |
| C | 4.25704300  | -0.12144600 | 0.55321900  |
| C | 6.76434500  | 0.59263200  | 0.22505300  |
| C | 6.75729400  | -0.74926600 | 0.04060900  |

\* Corresponding author.

E-mail addresses: zjwu@ciac.ac.cn

Tel.: 86-431-85262035. Fax: 86-431-85698041.

Present Addresses

No. 5625, Renmin Road, Changchun City, P. R. China.

|    |             |             |             |
|----|-------------|-------------|-------------|
| C  | 7.70170500  | 2.61449600  | -1.44821700 |
| H  | 7.65443400  | 1.96011500  | -2.32099200 |
| H  | 8.49306200  | 3.35586100  | -1.58828600 |
| H  | 6.74776600  | 3.12605500  | -1.30353700 |
| C  | 9.23214000  | -1.73937900 | 0.91240100  |
| H  | 9.65729800  | -0.74272900 | 1.04433500  |
| H  | 10.03117700 | -2.44717200 | 0.67365200  |
| H  | 8.72198700  | -2.06565900 | 1.82125600  |
| C  | -5.28020700 | 1.65438000  | -0.05913400 |
| C  | -5.09563000 | 1.49105200  | 1.35406600  |
| H  | -4.14247600 | 1.38576900  | 1.85422500  |
| C  | -6.38399000 | 1.44589900  | 1.96012600  |
| H  | -6.58326800 | 1.29544300  | 3.01320000  |
| C  | -7.36766700 | 1.59354500  | 0.93409600  |
| H  | -8.44034900 | 1.57421300  | 1.07532500  |
| C  | -6.69237400 | 1.72097300  | -0.31413200 |
| H  | -7.14701900 | 1.81799500  | -1.29065300 |
| C  | -5.27287200 | -1.57832400 | -0.51421300 |
| C  | -5.07407600 | -1.80206300 | 0.88858500  |
| H  | -4.11682900 | -1.82491400 | 1.39134200  |
| C  | -6.35616000 | -1.93718600 | 1.49459800  |
| H  | -6.54573900 | -2.07911600 | 2.55060100  |
| C  | -7.34950200 | -1.81176400 | 0.47500300  |
| H  | -8.42068500 | -1.84374100 | 0.62507800  |
| C  | -6.68690100 | -1.58855500 | -0.76656900 |
| H  | -7.15196200 | -1.42243300 | -1.72879300 |
| Fe | -6.18235300 | -0.08275000 | 0.55477600  |
| S  | -4.02934400 | 1.75915800  | -1.31875300 |
| S  | -4.03474900 | -1.32025000 | -1.76399800 |
| S  | -0.94682800 | 1.57465600  | -0.45898500 |
| S  | -0.95956100 | -1.40628400 | -0.89075800 |
| S  | 1.94400700  | 1.39039300  | 0.69593200  |
| S  | 1.92771500  | -1.58365100 | 0.26833900  |
| S  | 5.25310600  | 1.32531300  | 0.83279000  |
| S  | 5.23331300  | -1.60139200 | 0.38780500  |
| S  | 8.16497400  | 1.65589400  | 0.04967600  |
| S  | 8.08795300  | -1.77746000 | -0.52308500 |

The one-electron-oxidized species of H

|   |             |             |            |
|---|-------------|-------------|------------|
| C | 3.31362200  | 0.16678400  | 1.05254800 |
| C | 1.96239900  | 0.14691700  | 0.90459600 |
| C | -0.51499000 | 0.77426000  | 0.48001300 |
| C | -0.51404200 | -0.57794200 | 0.68158800 |
| C | -2.98156700 | 0.04228000  | 0.22158900 |

|    |             |             |             |
|----|-------------|-------------|-------------|
| C  | -4.34917100 | 0.01227900  | 0.04539900  |
| C  | -6.87660900 | 0.62615800  | -0.37539700 |
| C  | -6.87002300 | -0.71910200 | -0.18036800 |
| C  | -9.06923500 | 1.80040500  | 0.89142400  |
| H  | -9.39815600 | 0.82237800  | 1.24568900  |
| H  | -9.93868800 | 2.44355100  | 0.73172400  |
| H  | -8.39506700 | 2.27451400  | 1.60719900  |
| C  | -8.58942100 | -2.01921900 | -1.95261300 |
| H  | -8.85715800 | -1.06406200 | -2.40691900 |
| H  | -9.43891800 | -2.70458300 | -2.01351200 |
| H  | -7.72760600 | -2.46649800 | -2.45152000 |
| C  | 5.41516600  | 1.62228900  | -0.13319800 |
| C  | 5.27550800  | 1.46820500  | -1.55451800 |
| H  | 4.34186500  | 1.37848700  | -2.09280300 |
| C  | 6.58443800  | 1.42256500  | -2.11106400 |
| H  | 6.82157000  | 1.27770300  | -3.15680200 |
| C  | 7.53114700  | 1.56095300  | -1.05036400 |
| H  | 8.60765600  | 1.53769300  | -1.15499600 |
| C  | 6.81788300  | 1.68729000  | 0.17452900  |
| H  | 7.23996300  | 1.78581600  | 1.16530700  |
| C  | 5.38404000  | -1.59447400 | 0.32356000  |
| C  | 5.22385200  | -1.82781300 | -1.08457800 |
| H  | 4.28409600  | -1.85937400 | -1.61876400 |
| C  | 6.52399100  | -1.97105200 | -1.64536500 |
| H  | 6.74722200  | -2.12045100 | -2.69348100 |
| C  | 7.48476300  | -1.84300100 | -0.59617100 |
| H  | 8.55955800  | -1.87937500 | -0.71374700 |
| C  | 6.78957000  | -1.61255800 | 0.62397100  |
| H  | 7.22678700  | -1.45150900 | 1.59992000  |
| Fe | 6.31441200  | -0.10983900 | -0.71054800 |
| S  | 4.12492000  | 1.76067000  | 1.07678900  |
| S  | 4.11375800  | -1.35721500 | 1.53878300  |
| S  | 1.00786600  | 1.63036900  | 0.60147200  |
| S  | 1.00850900  | -1.36080900 | 1.04771600  |
| S  | -2.04232500 | 1.53282100  | 0.12305300  |
| S  | -2.03899800 | -1.41056500 | 0.55961300  |
| S  | -5.30748000 | 1.44218500  | -0.30025600 |
| S  | -5.29752400 | -1.46157200 | 0.14860700  |
| S  | -8.27030000 | 1.65159500  | -0.75913000 |
| S  | -8.26691300 | -1.80934300 | -0.15330400 |

Two-electron-oxidized species of H

|   |            |            |            |
|---|------------|------------|------------|
| C | 3.31045300 | 0.04776800 | 1.08501600 |
| C | 1.96137300 | 0.02568900 | 0.88854900 |

|    |             |             |             |
|----|-------------|-------------|-------------|
| C  | -0.52594500 | 0.65754000  | 0.48922900  |
| C  | -0.51259400 | -0.69301900 | 0.56172800  |
| C  | -2.99080700 | -0.06094900 | 0.21016800  |
| C  | -4.37013300 | -0.08943300 | 0.06423900  |
| C  | -6.89674200 | 0.57342900  | -0.16049100 |
| C  | -6.88289400 | -0.80421600 | -0.08923900 |
| C  | -7.82536900 | 3.21259500  | -0.36323600 |
| H  | -7.28767100 | 3.51099600  | 0.54058700  |
| H  | -8.74604500 | 3.79745000  | -0.43182100 |
| H  | -7.22788100 | 3.39119200  | -1.26104400 |
| C  | -8.74838600 | -1.99667900 | -1.81015400 |
| H  | -8.98434800 | -1.02024400 | -2.23582400 |
| H  | -9.64489400 | -2.62213200 | -1.82223300 |
| H  | -7.95359100 | -2.49153300 | -2.37087600 |
| C  | 5.33238300  | 1.66409600  | 0.04377400  |
| C  | 5.12296600  | 1.61363800  | -1.38016800 |
| H  | 4.16604400  | 1.51836400  | -1.87591800 |
| C  | 6.39478100  | 1.72890100  | -2.01530300 |
| H  | 6.57508800  | 1.70751100  | -3.08290500 |
| C  | 7.38918900  | 1.85081000  | -1.00443500 |
| H  | 8.45753600  | 1.91652200  | -1.17005800 |
| C  | 6.74760100  | 1.80208700  | 0.26185200  |
| H  | 7.23222400  | 1.83935300  | 1.22946600  |
| C  | 5.35818400  | -1.63169700 | 0.20646400  |
| C  | 5.14912900  | -1.72524400 | -1.21538200 |
| H  | 4.19180500  | -1.69479700 | -1.71855100 |
| C  | 6.42317900  | -1.88251000 | -1.83686000 |
| H  | 6.60405200  | -1.96412300 | -2.90149600 |
| C  | 7.41856400  | -1.88869800 | -0.81966600 |
| H  | 8.48795500  | -1.95380800 | -0.97873300 |
| C  | 6.77512300  | -1.72582800 | 0.43603400  |
| H  | 7.25868500  | -1.66078700 | 1.40272000  |
| Fe | 6.26328300  | -0.02032800 | -0.75790800 |
| S  | 4.13746400  | 1.61403400  | 1.35332800  |
| S  | 4.16346600  | -1.47021600 | 1.50740500  |
| S  | 0.99830900  | 1.51627600  | 0.69650100  |
| S  | 1.02742300  | -1.49495100 | 0.85651800  |
| S  | -2.07055100 | 1.44259600  | 0.23433900  |
| S  | -2.03896500 | -1.53356100 | 0.39299100  |
| S  | -5.32977600 | 1.37065900  | -0.11907200 |
| S  | -5.30768200 | -1.55386500 | 0.05993100  |
| S  | -8.38934900 | 1.47545000  | -0.26355800 |
| S  | -8.30000600 | -1.85486600 | -0.02653500 |

## Compound R

|   |              |             |             |
|---|--------------|-------------|-------------|
| N | -7.68258100  | 0.10408300  | -0.01629500 |
| C | -8.35077300  | 1.35404700  | 0.17758000  |
| C | -8.02761700  | 2.18047400  | 1.25807100  |
| C | -9.36735100  | 1.75906000  | -0.70264700 |
| C | -8.68413500  | 3.39683700  | 1.45448600  |
| H | -7.25144800  | 1.87343400  | 1.95258900  |
| C | -10.03798400 | 2.95709800  | -0.50358700 |
| H | -9.63001600  | 1.12336400  | -1.54255600 |
| C | -9.69934600  | 3.79056700  | 0.57395600  |
| H | -8.40660200  | 4.01499600  | 2.30035000  |
| H | -10.82513600 | 3.27684700  | -1.17902500 |
| C | -8.48925600  | -1.06499600 | -0.18138000 |
| C | -8.28744300  | -1.93288100 | -1.25894000 |
| C | -9.52227500  | -1.34572800 | 0.72808400  |
| C | -9.08111200  | -3.06990300 | -1.42488100 |
| H | -7.50000400  | -1.72010000 | -1.97569100 |
| C | -10.32746400 | -2.46238200 | 0.55961900  |
| H | -9.69095400  | -0.67687200 | 1.56629900  |
| C | -10.11166800 | -3.33841200 | -0.51574900 |
| H | -8.89679400  | -3.72305300 | -2.27006500 |
| H | -11.12868900 | -2.68543600 | 1.25702300  |
| C | -6.28670100  | 0.02906100  | -0.03242700 |
| C | -5.49928900  | 1.14240200  | -0.39758200 |
| C | -5.61624300  | -1.16532900 | 0.32462400  |
| C | -4.11742300  | 1.05779000  | -0.39910900 |
| H | -5.98276900  | 2.06845500  | -0.68704500 |
| C | -4.23577200  | -1.23622300 | 0.31465900  |
| H | -6.19560900  | -2.03118900 | 0.62465600  |
| C | -3.43655500  | -0.12794900 | -0.04744300 |
| H | -3.53827700  | 1.92987600  | -0.69411600 |
| H | -3.76554100  | -2.16870100 | 0.61344100  |
| C | -1.99052700  | -0.14509300 | -0.06991700 |
| H | -1.52999500  | 0.80663400  | -0.33727800 |
| C | -1.16514400  | -1.19416700 | 0.19802800  |
| H | -1.58755700  | -2.16327900 | 0.45625900  |
| C | 0.26709900   | -1.16617300 | 0.17338500  |
| C | 1.11105600   | -2.25258400 | 0.42884000  |
| S | 1.21588700   | 0.25681000  | -0.18563900 |
| C | 2.47231800   | -1.95247500 | 0.33612600  |
| H | 0.72268800   | -3.23567600 | 0.67309700  |
| C | 2.73403500   | -0.62014600 | 0.00703700  |
| H | 3.25729800   | -2.68258100 | 0.50051900  |
| C | 3.96782400   | 0.05838700  | -0.17729600 |

|   |              |             |             |
|---|--------------|-------------|-------------|
| H | 3.90291700   | 1.11076600  | -0.43565400 |
| C | 5.21132800   | -0.52234300 | -0.05074800 |
| H | 5.25827100   | -1.57497600 | 0.20509500  |
| C | 6.46446400   | 0.11419600  | -0.25305100 |
| C | 6.79691300   | 1.39595500  | -0.67452600 |
| C | 7.78586900   | -0.63051900 | -0.05297300 |
| O | 8.79008300   | 0.29333600  | -0.53374700 |
| C | 7.88689200   | -1.85265300 | -1.00576900 |
| C | 5.87632100   | 2.43787900  | -0.94937800 |
| N | 5.06257200   | 3.24663600  | -1.15219900 |
| C | 8.22691800   | 1.48368700  | -0.83746700 |
| C | 9.05057200   | 2.51574200  | -1.22957700 |
| C | 8.56018800   | 3.81016300  | -1.56566300 |
| C | 10.45952700  | 2.30209900  | -1.30445600 |
| N | 8.20628800   | 4.88370200  | -1.84622000 |
| N | 11.61049400  | 2.13595700  | -1.36494700 |
| F | 7.07199200   | -2.84479600 | -0.58380300 |
| F | 7.52341800   | -1.51751100 | -2.25460800 |
| F | 9.13371700   | -2.34223200 | -1.05678300 |
| C | 8.14643300   | -1.00545800 | 1.38923000  |
| C | 9.48625500   | -1.30949600 | 1.67894100  |
| C | 7.20507500   | -1.02497500 | 2.42357700  |
| C | 9.86673500   | -1.64279300 | 2.97650200  |
| H | 10.23161300  | -1.26979100 | 0.89354100  |
| C | 7.59113100   | -1.36210300 | 3.72247300  |
| H | 6.17063200   | -0.76491600 | 2.23184200  |
| C | 8.91988400   | -1.67512300 | 4.00236500  |
| H | 10.90789900  | -1.87110200 | 3.18564600  |
| H | 6.84819800   | -1.36892400 | 4.51510500  |
| H | 9.21935000   | -1.93337400 | 5.01431600  |
| O | -10.95272400 | -4.40930700 | -0.58456900 |
| C | -10.79214400 | -5.32387900 | -1.65795800 |
| H | -11.55920700 | -6.08732400 | -1.51745500 |
| H | -10.94076400 | -4.83506800 | -2.62982400 |
| H | -9.80165900  | -5.79759400 | -1.63977000 |
| O | -10.41165100 | 4.94831400  | 0.67489600  |
| C | -10.11503800 | 5.82982100  | 1.74743300  |
| H | -10.79109800 | 6.67864100  | 1.63203000  |
| H | -10.29278400 | 5.35423200  | 2.72099600  |
| H | -9.07683600  | 6.18431000  | 1.70267300  |

Compound 1

|   |              |            |            |
|---|--------------|------------|------------|
| C | -12.94089438 | 2.00953082 | 3.54756460 |
|---|--------------|------------|------------|

|    |              |             |             |
|----|--------------|-------------|-------------|
| C  | -11.79052359 | 1.60313862  | 2.95143559  |
| C  | -9.96185067  | 0.26068408  | 1.67594739  |
| C  | -9.47687382  | 1.50905594  | 1.76397194  |
| C  | -7.63232063  | 0.15577213  | 0.56705029  |
| C  | -6.41430428  | -0.28796804 | 0.18818265  |
| C  | -4.32467421  | -1.82984563 | -0.13606039 |
| C  | -3.81425153  | -0.52134559 | -0.04162901 |
| C  | -15.58064379 | 1.32377289  | 2.95580809  |
| C  | -15.65915195 | 1.41209345  | 1.52614191  |
| H  | -14.85697489 | 1.18279906  | 0.83785260  |
| C  | -16.95611716 | 1.89550249  | 1.18977466  |
| H  | -17.31447050 | 2.10386682  | 0.19009711  |
| C  | -17.68788054 | 2.09619212  | 2.40068879  |
| H  | -18.69620845 | 2.48143162  | 2.47669993  |
| C  | -16.84370841 | 1.74638845  | 3.49387535  |
| H  | -17.08427585 | 1.81279325  | 4.54615808  |
| C  | -14.39095183 | 4.35870442  | 3.15405893  |
| C  | -14.43878725 | 4.50072261  | 1.72759540  |
| H  | -13.66123814 | 4.19715594  | 1.03986167  |
| C  | -15.70108787 | 5.06655748  | 1.38778166  |
| H  | -16.05601120 | 5.26575651  | 0.38502959  |
| C  | -16.43231725 | 5.28892818  | 2.59514732  |
| H  | -17.43633426 | 5.68633927  | 2.66563257  |
| C  | -15.62926910 | 4.85287257  | 3.68823787  |
| H  | -15.90159586 | 4.85790859  | 4.73489149  |
| Fe | -15.95733453 | 3.26424808  | 2.40769511  |
| S  | -14.19771635 | 0.79804364  | 3.94251037  |
| S  | -13.06975672 | 3.69322004  | 4.14031445  |
| S  | -11.50465296 | -0.09386987 | 2.45859618  |
| S  | -10.41475335 | 2.70976297  | 2.65607460  |
| S  | -9.05488174  | -0.91768694 | 0.71801121  |
| S  | -7.96899920  | 1.87718369  | 0.91592478  |
| S  | -6.08307808  | -1.99260716 | -0.20308147 |
| S  | -5.01139355  | 0.78847604  | -0.01403509 |
| C  | -2.44456961  | -0.29628652 | -0.01431537 |
| C  | -1.54349166  | -1.37932545 | -0.08952738 |
| C  | -2.07384330  | -2.68181322 | -0.18839657 |
| C  | -3.44579147  | -2.91214804 | -0.20799625 |
| H  | -2.07469629  | 0.72080035  | 0.06570047  |
| H  | -1.39404300  | -3.52752130 | -0.24331650 |
| H  | -3.82834155  | -3.92611337 | -0.27497764 |
| C  | -0.09590883  | -1.21484968 | -0.06398062 |
| H  | 0.46623015   | -2.14431460 | -0.15140373 |
| C  | 0.59829695   | -0.05632418 | 0.05840461  |

|   |             |             |             |
|---|-------------|-------------|-------------|
| H | 0.06617720  | 0.88795648  | 0.15595595  |
| C | 2.03100358  | 0.07742967  | 0.07965806  |
| C | 2.73510230  | 1.27311015  | 0.22312104  |
| S | 3.14018842  | -1.26029721 | -0.07330272 |
| C | 4.12794841  | 1.11872568  | 0.21243524  |
| H | 2.23274463  | 2.22829557  | 0.33336683  |
| C | 4.54064128  | -0.20380205 | 0.05862909  |
| H | 4.82212600  | 1.94557991  | 0.31277386  |
| C | 5.85107732  | -0.76441402 | -0.00309589 |
| H | 5.90493887  | -1.84063134 | -0.13549599 |
| C | 7.01757135  | -0.04748799 | 0.09525581  |
| H | 6.95643320  | 1.02686522  | 0.23489040  |
| C | 8.33552394  | -0.57779272 | 0.02722535  |
| C | 8.81961927  | -1.85092921 | -0.22477010 |
| C | 9.55606377  | 0.32494623  | 0.23350219  |
| C | 8.02741899  | -2.99648565 | -0.49037037 |
| N | 7.31072166  | -3.88988295 | -0.70225763 |
| C | 10.26448721 | -1.81472961 | -0.20814571 |
| C | 11.20969160 | -2.79823718 | -0.38336055 |
| C | 10.86665633 | -4.16269086 | -0.61154757 |
| C | 12.59714306 | -2.46479638 | -0.33777097 |
| N | 10.63332750 | -5.28788665 | -0.79915730 |
| N | 13.73162221 | -2.20554688 | -0.30825779 |
| O | 10.68226517 | -0.54291937 | -0.00631015 |
| C | 9.69848732  | 0.71991142  | 1.73047497  |
| F | 8.61354989  | 1.40590504  | 2.16529129  |
| F | 10.77841886 | 1.48224141  | 1.93098987  |
| F | 9.80545749  | -0.38009493 | 2.49044733  |
| C | 9.61206403  | 1.50549835  | -0.73581314 |
| C | 9.20284083  | 2.79871026  | -0.38414925 |
| C | 10.04829684 | 1.26018830  | -2.04544774 |
| C | 9.23296218  | 3.82551231  | -1.33010899 |
| H | 8.87154160  | 3.02134339  | 0.62233244  |
| C | 10.07720446 | 2.28861645  | -2.98502148 |
| H | 10.38172622 | 0.26775476  | -2.32839354 |
| C | 9.66780696  | 3.57576167  | -2.63097396 |
| H | 8.92169843  | 4.82505129  | -1.03998291 |
| H | 10.42522277 | 2.08250788  | -3.99300920 |
| H | 9.69335450  | 4.37823402  | -3.36267005 |

Compound 2

|   |             |             |             |
|---|-------------|-------------|-------------|
| C | -2.80134800 | -0.45082400 | 0.23241100  |
| C | -3.81567000 | -0.43284600 | -0.67260100 |
| C | -5.61628400 | -1.06157100 | -2.44904200 |

|    |             |             |             |
|----|-------------|-------------|-------------|
| C  | -5.70705000 | 0.27166500  | -2.32201000 |
| C  | -7.35434400 | -0.33637500 | -4.21268200 |
| C  | -8.06192700 | -0.27614800 | -5.36119400 |
| C  | -8.80381100 | -0.77586800 | -7.82659900 |
| C  | -8.89810800 | 0.57100400  | -7.69831800 |
| C  | -0.44305600 | -1.94032500 | 0.15093300  |
| C  | 0.71489500  | -1.94945500 | 0.99936900  |
| H  | 0.70447500  | -2.00460500 | 2.07887900  |
| C  | 1.86878200  | -1.81094200 | 0.16650100  |
| C  | 1.42423100  | -1.72396100 | -1.19558300 |
| H  | 2.06472500  | -1.58026600 | -2.05557900 |
| C  | 0.00316500  | -1.82030100 | -1.20657300 |
| H  | -0.63704400 | -1.76389500 | -2.07653000 |
| C  | -0.66283700 | 1.32594700  | 0.46478900  |
| C  | 0.49516200  | 1.32935800  | 1.31368600  |
| H  | 0.49235500  | 1.17788600  | 2.38390600  |
| C  | 1.64586400  | 1.50481600  | 0.48351900  |
| C  | 1.19818700  | 1.61884500  | -0.87558500 |
| H  | 1.84029100  | 1.72669800  | -1.73960000 |
| C  | -0.22289500 | 1.52537100  | -0.88532300 |
| H  | -0.86124000 | 1.54915400  | -1.75819000 |
| Fe | 0.60777200  | -0.19253400 | -0.07066100 |
| S  | -2.11705600 | -2.02244700 | 0.74968600  |
| S  | -2.32508700 | 1.07032700  | 1.04728400  |
| S  | -4.42616900 | -1.91538600 | -1.46348800 |
| S  | -4.62971300 | 1.07648900  | -1.17794400 |
| S  | -6.76730000 | -1.87706800 | -3.51656400 |
| S  | -6.97046700 | 1.11115800  | -3.23260400 |
| S  | -8.50519900 | -1.70129700 | -6.32557800 |
| S  | -8.70901400 | 1.23019000  | -6.04675300 |
| C  | 3.79134200  | 0.95456700  | 6.07363100  |
| H  | 3.79841000  | 2.04269600  | 6.01606400  |
| C  | 3.83899000  | 0.37240000  | 7.29599500  |
| H  | 3.80692200  | -0.71227800 | 7.37933500  |
| C  | 3.92080200  | 1.05130100  | 8.56374600  |
| C  | 3.92057700  | 0.43647100  | 9.81468600  |
| S  | 4.03932100  | 2.78216300  | 8.74143100  |
| C  | 4.00819700  | 1.33282500  | 10.88932200 |
| H  | 3.85615600  | -0.64049800 | 9.92830800  |
| C  | 4.08165100  | 2.66713800  | 10.49521000 |
| H  | 4.02022900  | 1.02175900  | 11.92786200 |
| C  | 4.18596900  | 3.85863600  | 11.27658800 |
| H  | 4.24515800  | 4.79098800  | 10.72346400 |
| C  | 4.21971100  | 3.89270700  | 12.64711600 |

|   |             |             |             |
|---|-------------|-------------|-------------|
| H | 4.15783900  | 2.95583100  | 13.19088200 |
| C | 4.32730500  | 5.05787700  | 13.45813400 |
| C | 4.35747100  | 6.40800400  | 13.15619800 |
| C | 4.41886500  | 4.94365400  | 14.98319400 |
| C | 4.28012400  | 6.96283600  | 11.85347000 |
| N | 4.20922700  | 7.34142300  | 10.75432700 |
| C | 4.44950200  | 7.16155700  | 14.38736600 |
| C | 4.52804200  | 8.51214800  | 14.63198900 |
| C | 4.55443200  | 9.48239100  | 13.58805300 |
| C | 4.58867600  | 8.98699400  | 15.97715300 |
| N | 4.57966100  | 10.30880600 | 12.76832200 |
| N | 4.63354300  | 9.38734400  | 17.06924900 |
| O | 4.41905600  | 6.31138500  | 15.44021400 |
| C | 5.81315600  | 4.40380600  | 15.40828500 |
| F | 6.04014000  | 3.17084000  | 14.89318400 |
| F | 5.91934700  | 4.32362600  | 16.73843800 |
| F | 6.78097900  | 5.21184500  | 14.95077000 |
| C | 3.23848500  | 4.20151100  | 15.60912100 |
| C | 3.30397100  | 2.85825900  | 16.00281400 |
| C | 2.02725400  | 4.89440400  | 15.74505100 |
| C | 2.17410400  | 2.22485300  | 16.52481400 |
| H | 4.22760100  | 2.29895500  | 15.92089700 |
| C | 0.90354900  | 4.25786100  | 16.26755200 |
| H | 1.96516700  | 5.93837100  | 15.45763300 |
| C | 0.97249100  | 2.91906900  | 16.65827100 |
| H | 2.24264900  | 1.18587900  | 16.83450700 |
| H | -0.02453600 | 4.81206300  | 16.37296100 |
| H | 0.09718500  | 2.42360300  | 17.06849100 |
| S | 3.58232300  | -1.78649200 | 0.63701900  |
| S | 3.35520500  | 1.61467100  | 0.95579900  |
| C | 3.71640800  | 0.27331500  | 4.78489000  |
| C | 3.54207900  | 1.04833600  | 3.62135300  |
| C | 3.81289400  | -1.12150800 | 4.62977400  |
| C | 3.45654800  | 0.47859600  | 2.34818200  |
| H | 3.47636500  | 2.12909000  | 3.70868300  |
| C | 3.72918100  | -1.70079900 | 3.36950400  |
| H | 3.96424800  | -1.76273600 | 5.49260000  |
| C | 3.55000100  | -0.92472300 | 2.21305800  |
| H | 3.81383200  | -2.77790100 | 3.26444100  |
| S | -9.12543100 | -1.69596100 | -9.29852200 |
| S | -9.36547400 | 1.69597200  | -8.97588300 |
| C | -7.53560800 | -2.58635800 | -9.53684900 |
| H | -6.72306300 | -1.88258100 | -9.72999500 |
| H | -7.29565800 | -3.21303400 | -8.67550700 |

|   |             |             |              |
|---|-------------|-------------|--------------|
| H | -7.68194300 | -3.22162800 | -10.41468100 |
| C | -7.92910000 | 2.84194200  | -9.01033700  |
| H | -8.17180800 | 3.59527300  | -9.76476700  |
| H | -7.78512500 | 3.33286300  | -8.04573700  |
| H | -7.01944500 | 2.31411900  | -9.30491000  |

The one-electron-oxidized species of 2

|    |              |             |             |
|----|--------------|-------------|-------------|
| C  | -4.41741800  | 0.75772900  | -0.67708300 |
| C  | -5.65216700  | 0.19434100  | -0.67226800 |
| C  | -8.15309000  | -0.35074700 | -1.08125400 |
| C  | -7.75149700  | -1.21775200 | -0.11126200 |
| C  | -10.26202600 | -1.72320500 | -0.48092200 |
| C  | -11.53562000 | -2.24922200 | -0.43096300 |
| C  | -14.07934200 | -2.79159900 | -0.78128600 |
| C  | -13.66616700 | -3.65964500 | 0.18896200  |
| C  | -3.57144900  | 3.41929000  | -0.93580200 |
| C  | -2.25213600  | 3.98725100  | -0.95610700 |
| H  | -1.41672800  | 3.62782800  | -1.54036900 |
| C  | -2.23458600  | 5.07528100  | -0.02992000 |
| C  | -3.54210200  | 5.18284500  | 0.55301300  |
| H  | -3.82964500  | 5.89373300  | 1.31628400  |
| C  | -4.37161500  | 4.17609100  | -0.01496200 |
| H  | -5.40784800  | 3.98569700  | 0.22938100  |
| C  | -2.63473100  | 1.32761100  | 1.40907600  |
| C  | -1.31683300  | 1.89911700  | 1.40618400  |
| H  | -0.50085100  | 1.60539900  | 0.76093900  |
| C  | -1.29973000  | 2.95241000  | 2.37105600  |
| C  | -2.60100800  | 3.02447700  | 2.97268200  |
| H  | -2.90616900  | 3.74685700  | 3.71797400  |
| C  | -3.41967400  | 2.01371500  | 2.39534200  |
| H  | -4.45888800  | 1.82121400  | 2.62481800  |
| Fe | -2.74313300  | 3.30344100  | 0.92198600  |
| S  | -4.06654700  | 2.01440400  | -1.90470300 |
| S  | -3.14720300  | 0.00572000  | 0.33817600  |
| S  | -6.96388200  | 0.74685500  | -1.76057200 |
| S  | -6.07204100  | -1.18077900 | 0.39711900  |
| S  | -9.82634900  | -0.41021200 | -1.57643400 |
| S  | -8.94866900  | -2.30665300 | 0.54365100  |
| S  | -12.85185500 | -1.70314400 | -1.43990200 |
| S  | -11.96892600 | -3.55714500 | 0.66735700  |
| C  | 4.23996700   | 2.93488500  | 0.01166200  |
| H  | 4.40034200   | 2.27997000  | 0.86733100  |
| C  | 5.19030500   | 2.97492300  | -0.95487400 |
| H  | 5.06017300   | 3.62499200  | -1.81798800 |

|   |             |             |             |
|---|-------------|-------------|-------------|
| C | 6.41643100  | 2.22159700  | -0.96870700 |
| C | 7.39540700  | 2.27326100  | -1.96026700 |
| S | 6.88246200  | 1.09950800  | 0.28336000  |
| C | 8.49247600  | 1.43353200  | -1.72031600 |
| H | 7.30228200  | 2.91247700  | -2.83185300 |
| C | 8.38692400  | 0.70971200  | -0.53398500 |
| H | 9.34167000  | 1.35196600  | -2.38908200 |
| C | 9.27715800  | -0.23805000 | 0.06149500  |
| H | 8.95346600  | -0.66905800 | 1.00353800  |
| C | 10.48235300 | -0.61976000 | -0.46606600 |
| H | 10.80608000 | -0.17857100 | -1.40319500 |
| C | 11.38579900 | -1.56355200 | 0.10684100  |
| C | 11.28724800 | -2.39029600 | 1.21011300  |
| C | 12.75489200 | -1.82747700 | -0.52690900 |
| C | 10.16535200 | -2.48425800 | 2.07312300  |
| N | 9.20456900  | -2.50390000 | 2.73085700  |
| C | 12.50093100 | -3.17200600 | 1.31809200  |
| C | 12.90114100 | -4.11188800 | 2.23763600  |
| C | 12.09725200 | -4.48003600 | 3.35567800  |
| C | 14.16572000 | -4.75726100 | 2.08815400  |
| N | 11.47040300 | -4.80782600 | 4.28032500  |
| N | 15.19202600 | -5.29388200 | 1.97279600  |
| O | 13.31478400 | -2.88651700 | 0.27685100  |
| C | 13.70881200 | -0.62343700 | -0.28413600 |
| F | 13.21170800 | 0.51156500  | -0.83413400 |
| F | 14.91628600 | -0.84662100 | -0.80808500 |
| F | 13.84532000 | -0.40322200 | 1.03173800  |
| C | 12.67287500 | -2.28476400 | -1.98273700 |
| C | 12.88758000 | -1.42010000 | -3.06449700 |
| C | 12.32226800 | -3.61909800 | -2.23276400 |
| C | 12.75546400 | -1.88940000 | -4.37313300 |
| H | 13.17239000 | -0.38804200 | -2.90257300 |
| C | 12.19320000 | -4.08188600 | -3.54050600 |
| H | 12.16864100 | -4.30411100 | -1.40600100 |
| C | 12.40804100 | -3.21765300 | -4.61603700 |
| H | 12.93681300 | -1.21125400 | -5.20205300 |
| H | 11.93121700 | -5.12098000 | -3.71692300 |
| H | 12.31237000 | -3.57999100 | -5.63551500 |
| S | -0.90211500 | 6.17824000  | 0.36749900  |
| S | 0.04040000  | 4.01846700  | 2.83539700  |
| C | 2.99430300  | 3.69208200  | 0.04923500  |
| C | 2.14422300  | 3.53048700  | 1.16251400  |
| C | 2.58345200  | 4.58518700  | -0.95795900 |
| C | 0.93906400  | 4.22437100  | 1.28934900  |

|   |              |             |             |
|---|--------------|-------------|-------------|
| H | 2.43980700   | 2.85598100  | 1.96099700  |
| C | 1.38467500   | 5.27936200  | -0.84513400 |
| H | 3.20082700   | 4.74652400  | -1.83592500 |
| C | 0.54447700   | 5.11861400  | 0.26832000  |
| H | 1.08848700   | 5.97277400  | -1.62606200 |
| S | -15.69885400 | -2.74258800 | -1.48066900 |
| S | -14.74534400 | -4.83906300 | 0.92514900  |
| C | -16.50436400 | -1.44507500 | -0.45074700 |
| H | -16.52974900 | -1.74475300 | 0.59835600  |
| H | -16.00128000 | -0.48324700 | -0.56906100 |
| H | -17.52638600 | -1.36662800 | -0.83081200 |
| C | -13.69565100 | -5.61708500 | 2.20668200  |
| H | -14.34962700 | -6.34616500 | 2.69170200  |
| H | -12.84747200 | -6.14864400 | 1.76764300  |
| H | -13.36226000 | -4.89278400 | 2.95402300  |

The two-electron-oxidized species of 2

|    |             |              |             |
|----|-------------|--------------|-------------|
| C  | 4.96596700  | -4.56301700  | 0.42524900  |
| C  | 5.96579600  | -5.48450300  | 0.35052600  |
| C  | 7.84681400  | -7.18070200  | 0.89480000  |
| C  | 7.78184900  | -7.13946300  | -0.47007800 |
| C  | 9.66627600  | -8.82565800  | 0.07547700  |
| C  | 10.67828700 | -9.76880900  | 0.00328400  |
| C  | 12.53629400 | -11.54231200 | 0.52580200  |
| C  | 12.45268700 | -11.50944600 | -0.84494000 |
| C  | 4.49110200  | -2.40142500  | 2.14931000  |
| C  | 3.39082500  | -1.48433900  | 2.22787300  |
| H  | 2.34269200  | -1.74860400  | 2.22664700  |
| C  | 3.93700300  | -0.16225500  | 2.27554400  |
| C  | 5.36914700  | -0.26734400  | 2.23413500  |
| H  | 6.05878900  | 0.56638100   | 2.22863500  |
| C  | 5.71253000  | -1.64457800  | 2.17172300  |
| H  | 6.71254300  | -2.05245400  | 2.11602800  |
| C  | 4.36013000  | -2.29812600  | -1.11749700 |
| C  | 3.26366900  | -1.37292000  | -1.05549600 |
| H  | 2.21715800  | -1.63403900  | -0.98337500 |
| C  | 3.81504700  | -0.05366100  | -1.05603500 |
| C  | 5.24473200  | -0.16603500  | -1.13463700 |
| H  | 5.93978000  | 0.66310700   | -1.12563000 |
| C  | 5.58143900  | -1.54586500  | -1.18647800 |
| H  | 6.57970400  | -1.95958300  | -1.22944400 |
| Fe | 4.52602500  | -1.13919900  | 0.54944900  |
| S  | 4.31010000  | -4.16659000  | 2.04241500  |
| S  | 4.17244100  | -4.06506400  | -1.10144900 |

|   |              |              |              |
|---|--------------|--------------|--------------|
| S | 6.72257300   | -6.19495900  | 1.80560400   |
| S | 6.58260400   | -6.10005900  | -1.21020000  |
| S | 9.04519300   | -8.22415500  | 1.60951400   |
| S | 8.90255600   | -8.13796200  | -1.35475600  |
| S | 11.45404300  | -10.46597400 | 1.39688000   |
| S | 11.29238500  | -10.37265900 | -1.52955700  |
| C | -2.13969500  | 1.22729400   | -0.61417900  |
| H | -2.02241100  | 1.20459100   | -1.69690800  |
| C | -3.40682600  | 1.30259900   | -0.10462500  |
| H | -3.55590700  | 1.35045400   | 0.97163600   |
| C | -4.60914300  | 1.34808800   | -0.86903500  |
| C | -5.90604600  | 1.48635200   | -0.33867600  |
| S | -4.67216300  | 1.24910700   | -2.61174400  |
| C | -6.90737900  | 1.51901400   | -1.30183900  |
| H | -6.08655700  | 1.56416200   | 0.72794700   |
| C | -6.42067600  | 1.39985200   | -2.61664700  |
| H | -7.96091700  | 1.62178600   | -1.06954600  |
| C | -7.11398500  | 1.37954800   | -3.85508800  |
| H | -6.50631900  | 1.24532800   | -4.74390700  |
| C | -8.47757600  | 1.52816700   | -3.99117000  |
| H | -9.08024300  | 1.69103000   | -3.10309900  |
| C | -9.19963200  | 1.50080600   | -5.21431600  |
| C | -8.80829200  | 1.18524300   | -6.50769600  |
| C | -10.69185900 | 1.84103900   | -5.26491800  |
| C | -7.50553500  | 0.78962800   | -6.90376300  |
| N | -6.40972800  | 0.47403400   | -7.13934400  |
| C | -9.96189300  | 1.28214600   | -7.36880100  |
| C | -10.08915500 | 1.08336000   | -8.73011600  |
| C | -8.98148400  | 0.73830600   | -9.55347700  |
| C | -11.36445600 | 1.22598800   | -9.34764900  |
| N | -8.09319600  | 0.45441600   | -10.25129700 |
| N | -12.40529300 | 1.33592600   | -9.85808200  |
| O | -11.05303100 | 1.59209400   | -6.64494000  |
| C | -10.88750200 | 3.37594700   | -5.09173800  |
| F | -10.39799700 | 3.78253500   | -3.89582000  |
| F | -12.17208300 | 3.71635100   | -5.16442400  |
| F | -10.20979500 | 4.03007600   | -6.04727700  |
| C | -11.54923100 | 0.97666300   | -4.34593000  |
| C | -12.07502600 | 1.44473000   | -3.13353500  |
| C | -11.78049400 | -0.35367500  | -4.72722500  |
| C | -12.82473400 | 0.59014900   | -2.32227300  |
| H | -11.92721200 | 2.46969900   | -2.81713000  |
| C | -12.53145900 | -1.19948100  | -3.91454500  |
| H | -11.39442900 | -0.72632000  | -5.67048400  |

|   |              |              |             |
|---|--------------|--------------|-------------|
| C | -13.05511700 | -0.72996000  | -2.70772500 |
| H | -13.23990600 | 0.96850100   | -1.39289400 |
| H | -12.71399000 | -2.22245000  | -4.22945600 |
| H | -13.64651300 | -1.38739600  | -2.07746800 |
| S | 3.08943300   | 1.38187600   | 2.45931000  |
| S | 2.98292300   | 1.50944400   | -1.00427700 |
| C | -0.90226200  | 1.19961400   | 0.13471300  |
| C | 0.31718900   | 1.20445400   | -0.58080300 |
| C | -0.83467000  | 1.19000500   | 1.54478000  |
| C | 1.55901300   | 1.21452400   | 0.05433400  |
| H | 0.29205700   | 1.23771800   | -1.66605700 |
| C | 0.39241000   | 1.18816700   | 2.18951400  |
| H | -1.74021800  | 1.18237900   | 2.14241300  |
| C | 1.60520900   | 1.19798200   | 1.47315500  |
| H | 0.42932800   | 1.18450200   | 3.27408300  |
| S | 13.55533600  | -12.62779300 | 1.47363500  |
| S | 13.42758700  | -12.54946500 | -1.86354000 |
| C | 15.16365600  | -11.72591500 | 1.47453500  |
| H | 15.54095500  | -11.59839800 | 0.45870100  |
| H | 15.06925200  | -10.76511500 | 1.98367600  |
| H | 15.84657000  | -12.36876000 | 2.03613400  |
| C | 12.93736300  | -12.05597100 | -3.55524700 |
| H | 13.53819500  | -12.69000600 | -4.21201500 |
| H | 11.88017800  | -12.26152500 | -3.74252400 |
| H | 13.18107300  | -11.00987000 | -3.75793800 |

### Compound 3

|   |              |             |             |
|---|--------------|-------------|-------------|
| C | -10.51387605 | 0.64423796  | -0.88668717 |
| C | -10.12091863 | -0.65184795 | -0.95091605 |
| C | -8.10424433  | 0.61420787  | 0.15489835  |
| C | -6.83514295  | 0.98459433  | 0.42548550  |
| C | -4.62737779  | 2.38936129  | 0.54782664  |
| C | -4.21287206  | 1.04554371  | 0.47902262  |
| S | -12.04167831 | 1.28843744  | -1.49459294 |
| S | -11.05388239 | -1.97554578 | -1.65492853 |
| S | -9.47015159  | 1.74918259  | 0.05608777  |
| S | -8.61389020  | -1.07287685 | -0.08411785 |
| S | -6.36212470  | 2.67785431  | 0.71836705  |
| S | -5.49433895  | -0.17877307 | 0.58264698  |
| C | -2.86592267  | 0.72582203  | 0.37774158  |
| C | -1.89124675  | 1.74553696  | 0.35151738  |
| C | -2.32593086  | 3.08430742  | 0.42427667  |
| C | -3.67498533  | 3.40946677  | 0.51744205  |
| H | -2.57038091  | -0.31690280 | 0.31993924  |

|   |             |             |             |
|---|-------------|-------------|-------------|
| H | -1.58893541 | 3.88233192  | 0.40149502  |
| H | -3.98394014 | 4.44939184  | 0.56394752  |
| C | -0.46272946 | 1.48133416  | 0.24995183  |
| H | 0.16309416  | 2.37349720  | 0.25572739  |
| C | 0.14724546  | 0.27428630  | 0.15114732  |
| H | -0.44861435 | -0.63624541 | 0.13633536  |
| C | 1.56424224  | 0.04465346  | 0.05825253  |
| C | 2.18193169  | -1.20076483 | -0.05573689 |
| S | 2.76407881  | 1.31241136  | 0.07749353  |
| C | 3.57965575  | -1.13953234 | -0.12698138 |
| H | 1.61412376  | -2.12475136 | -0.08494177 |
| C | 4.08487222  | 0.15807518  | -0.06865677 |
| H | 4.21267657  | -2.01528999 | -0.21675160 |
| C | 5.42981909  | 0.63061337  | -0.10326054 |
| H | 5.56111211  | 1.70607311  | -0.03290217 |
| C | 6.53985707  | -0.16867093 | -0.21840138 |
| H | 6.40014973  | -1.24200550 | -0.29665627 |
| C | 7.89172476  | 0.27102614  | -0.23995266 |
| C | 8.47322166  | 1.51781619  | -0.07813699 |
| C | 9.03685500  | -0.72422142 | -0.45622662 |
| C | 7.77490911  | 2.72827353  | 0.16161094  |
| N | 7.13185285  | 3.67958981  | 0.35724690  |
| C | 9.90946418  | 1.37942502  | -0.15595331 |
| C | 10.92717049 | 2.30048756  | -0.07493283 |
| C | 10.69010748 | 3.69557151  | 0.09493885  |
| C | 12.28468088 | 1.86760092  | -0.16384551 |
| N | 10.54358456 | 4.84252245  | 0.23214545  |
| N | 13.39590922 | 1.52696758  | -0.22974533 |
| O | 10.22997056 | 0.07238859  | -0.30705502 |
| C | 9.08151570  | -1.19464936 | -1.93790944 |
| F | 7.93132439  | -1.81761663 | -2.29248573 |
| F | 10.09385818 | -2.04248076 | -2.14923939 |
| F | 9.23104026  | -0.14035021 | -2.75383691 |
| C | 9.05852483  | -1.86139719 | 0.56479338  |
| C | 8.53617851  | -3.13360516 | 0.29769079  |
| C | 9.58103773  | -1.59173910 | 1.83719340  |
| C | 8.54002247  | -4.11584654 | 1.28986325  |
| H | 8.13713206  | -3.37530225 | -0.67951661 |
| C | 9.58303318  | -2.57574851 | 2.82312016  |
| H | 10.00243585 | -0.61622449 | 2.05375368  |
| C | 9.06046604  | -3.84179751 | 2.55354315  |
| H | 8.14022135  | -5.10053632 | 1.06472937  |
| H | 9.99864808  | -2.35182947 | 3.80128597  |
| H | 9.06485220  | -4.60992427 | 3.32164775  |

|   |              |             |             |
|---|--------------|-------------|-------------|
| C | -9.87481662  | -2.64935876 | -2.89344484 |
| H | -8.94954208  | -2.98736691 | -2.42270607 |
| H | -10.38168916 | -3.50554686 | -3.34672434 |
| H | -9.65662707  | -1.90765420 | -3.66473805 |
| C | -11.46314248 | 2.59525282  | -2.65024237 |
| H | -12.36963365 | 3.06600967  | -3.04017121 |
| H | -10.86092393 | 3.34646854  | -2.13546047 |
| H | -10.89757977 | 2.15863588  | -3.47613232 |

Compound 4

|    |              |             |             |
|----|--------------|-------------|-------------|
| C  | -6.40192900  | 1.55413100  | -1.05748700 |
| C  | -5.86418100  | 0.25876400  | -1.25466200 |
| C  | -8.90544000  | 1.36521200  | 0.18164800  |
| C  | -8.41976800  | 1.40971300  | 1.52828600  |
| H  | -7.44075000  | 1.75292200  | 1.83377600  |
| C  | -9.43573600  | 0.88062300  | 2.37842700  |
| H  | -9.35787100  | 0.74810200  | 3.44963900  |
| C  | -10.55341600 | 0.52011600  | 1.56698200  |
| H  | -11.47278900 | 0.06712900  | 1.91394200  |
| C  | -10.22717400 | 0.80931100  | 0.20791600  |
| H  | -10.84702400 | 0.62195600  | -0.65844000 |
| C  | -7.64193000  | -1.65859900 | -0.26055400 |
| C  | -7.11848200  | -1.66058600 | 1.07245400  |
| H  | -6.15646900  | -1.26768400 | 1.37188300  |
| C  | -8.10872800  | -2.22375900 | 1.93163200  |
| H  | -8.02760500  | -2.32941400 | 3.00555900  |
| C  | -9.23803800  | -2.58227400 | 1.13568000  |
| H  | -10.16395100 | -3.00839200 | 1.49892300  |
| C  | -8.95795600  | -2.22678700 | -0.21815800 |
| H  | -9.62342500  | -2.33445100 | -1.06408700 |
| Fe | -8.86665600  | -0.54176800 | 0.96702800  |
| S  | -8.13132500  | 1.96810200  | -1.30040400 |
| S  | -6.84732500  | -1.15715200 | -1.76887100 |
| C  | -4.48750300  | 0.06179600  | -1.14672900 |
| C  | -3.60149200  | 1.11773200  | -0.84895500 |
| C  | -4.15372700  | 2.39494100  | -0.65205200 |
| C  | -5.52580600  | 2.60521200  | -0.75596800 |
| H  | -4.10709600  | -0.94120200 | -1.30766200 |
| H  | -3.49955000  | 3.23149300  | -0.41940400 |
| H  | -5.93395800  | 3.60039700  | -0.61049700 |
| C  | -2.15676100  | 0.94596400  | -0.73941900 |
| H  | -1.61227900  | 1.84834400  | -0.46166000 |
| C  | -1.45035100  | -0.19051600 | -0.95316300 |
| H  | -1.96698600  | -1.10296100 | -1.24395300 |

|   |             |             |             |
|---|-------------|-------------|-------------|
| C | -0.02203300 | -0.33808200 | -0.84332600 |
| C | 0.69630100  | -1.50621700 | -1.09535200 |
| S | 1.06021300  | 0.94565100  | -0.37066600 |
| C | 2.08050700  | -1.37285000 | -0.91736200 |
| H | 0.21105600  | -2.42637000 | -1.40311300 |
| C | 2.46965300  | -0.09527300 | -0.51965700 |
| H | 2.78407200  | -2.18319600 | -1.07173000 |
| C | 3.76592400  | 0.43303600  | -0.23871800 |
| H | 3.80216000  | 1.47364400  | 0.06867400  |
| C | 4.93801800  | -0.27342500 | -0.33636200 |
| H | 4.89400600  | -1.31019900 | -0.65329000 |
| C | 6.24269000  | 0.22261700  | -0.05916900 |
| C | 6.69585500  | 1.43138500  | 0.44129400  |
| C | 7.48077400  | -0.64834100 | -0.29737800 |
| C | 5.87748600  | 2.52675100  | 0.81712800  |
| N | 5.14014900  | 3.38109800  | 1.10523300  |
| C | 8.13660600  | 1.38284600  | 0.55047500  |
| C | 9.05692300  | 2.31345600  | 0.97208200  |
| C | 8.68778900  | 3.62459700  | 1.39198300  |
| C | 10.44422800 | 1.97718100  | 0.99926200  |
| N | 8.43266100  | 4.70518000  | 1.74252300  |
| N | 11.57761500 | 1.71367200  | 1.03162400  |
| O | 8.57645200  | 0.15752000  | 0.17941600  |
| C | 7.75877100  | -0.79940700 | -1.81987700 |
| F | 6.71545100  | -1.38621300 | -2.45559600 |
| F | 8.84970400  | -1.53868600 | -2.04372000 |
| F | 7.93795300  | 0.40684700  | -2.37824200 |
| C | 7.45295700  | -1.97073300 | 0.46914900  |
| C | 7.04292900  | -3.17676300 | -0.11526400 |
| C | 7.80501700  | -1.95520200 | 1.82597100  |
| C | 6.98806600  | -4.34400900 | 0.64902700  |
| H | 6.77832000  | -3.22288400 | -1.16421300 |
| C | 7.74934000  | -3.12335100 | 2.58365700  |
| H | 8.14069100  | -1.03368100 | 2.28856600  |
| C | 7.33836800  | -4.32246100 | 1.99835800  |
| H | 6.67727100  | -5.27296100 | 0.17938200  |
| H | 8.03323900  | -3.09464400 | 3.63162200  |
| H | 7.29791900  | -5.23342200 | 2.58866800  |
